# Supplementary material for: The genetic framework of shoot regeneration in Arabidopsis comprises master regulators and conditional fine-tuning factors
Source: PubMed Central journal article supplement (PMC7532540; doi:10.1038/s42003-020-01274-9), 2020-10-02
Supplement: 42003_2020_1274_MOESM1_ESM.pdf [file 42003_2020_1274_MOESM1_ESM.pdf]

## Supplementary Information

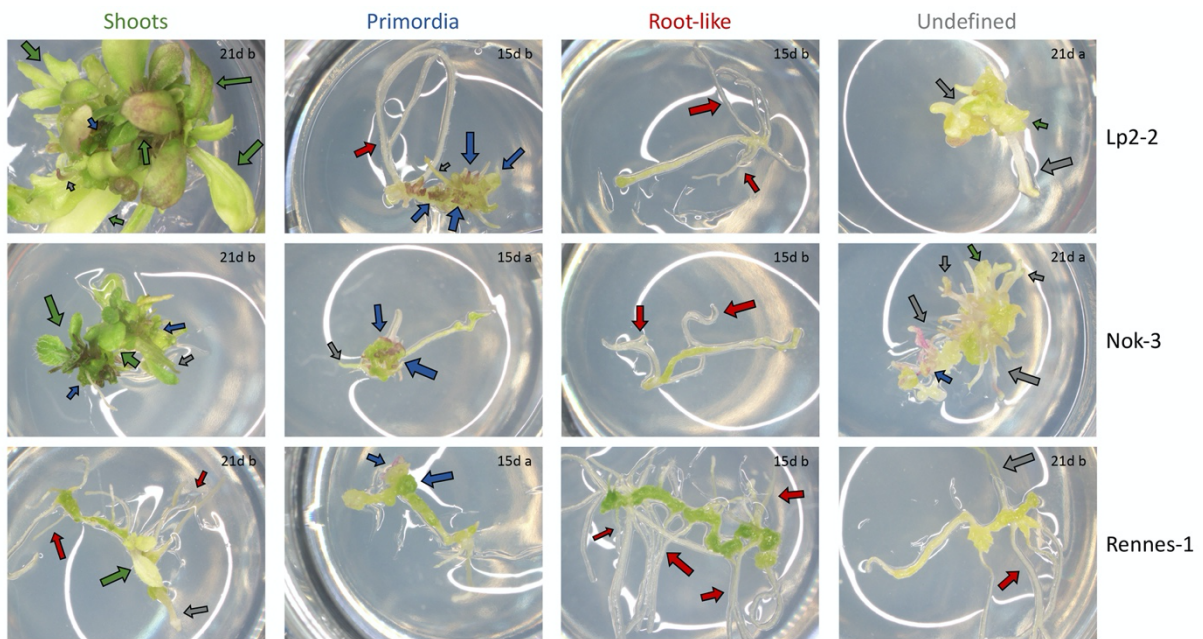

**Supplementary Figure 1.** Representative images of shoots, shoot primordia, root-like structures and undefined structures formed by explants of *Arabidopsis* accessions Lp2-2, Nok-3 and Rennes-1 after 15 or 21 days on SIM following protocol a or b (see individual pictures for details). Images are classified according to their most abundant feature and columns show natural variation in each phenotype. Green, blue, red and grey arrows respectively indicate shoots, shoot primordia, root-like structures and undefined structures.

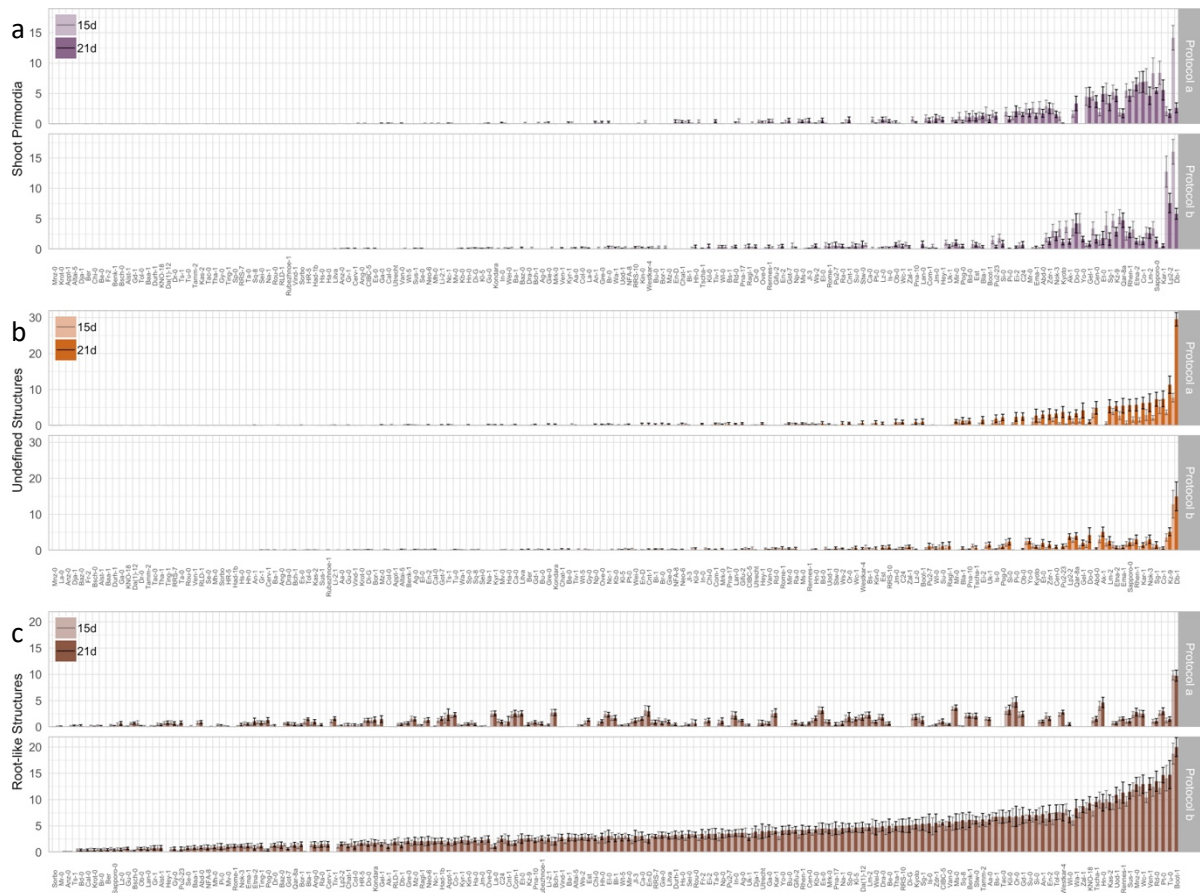

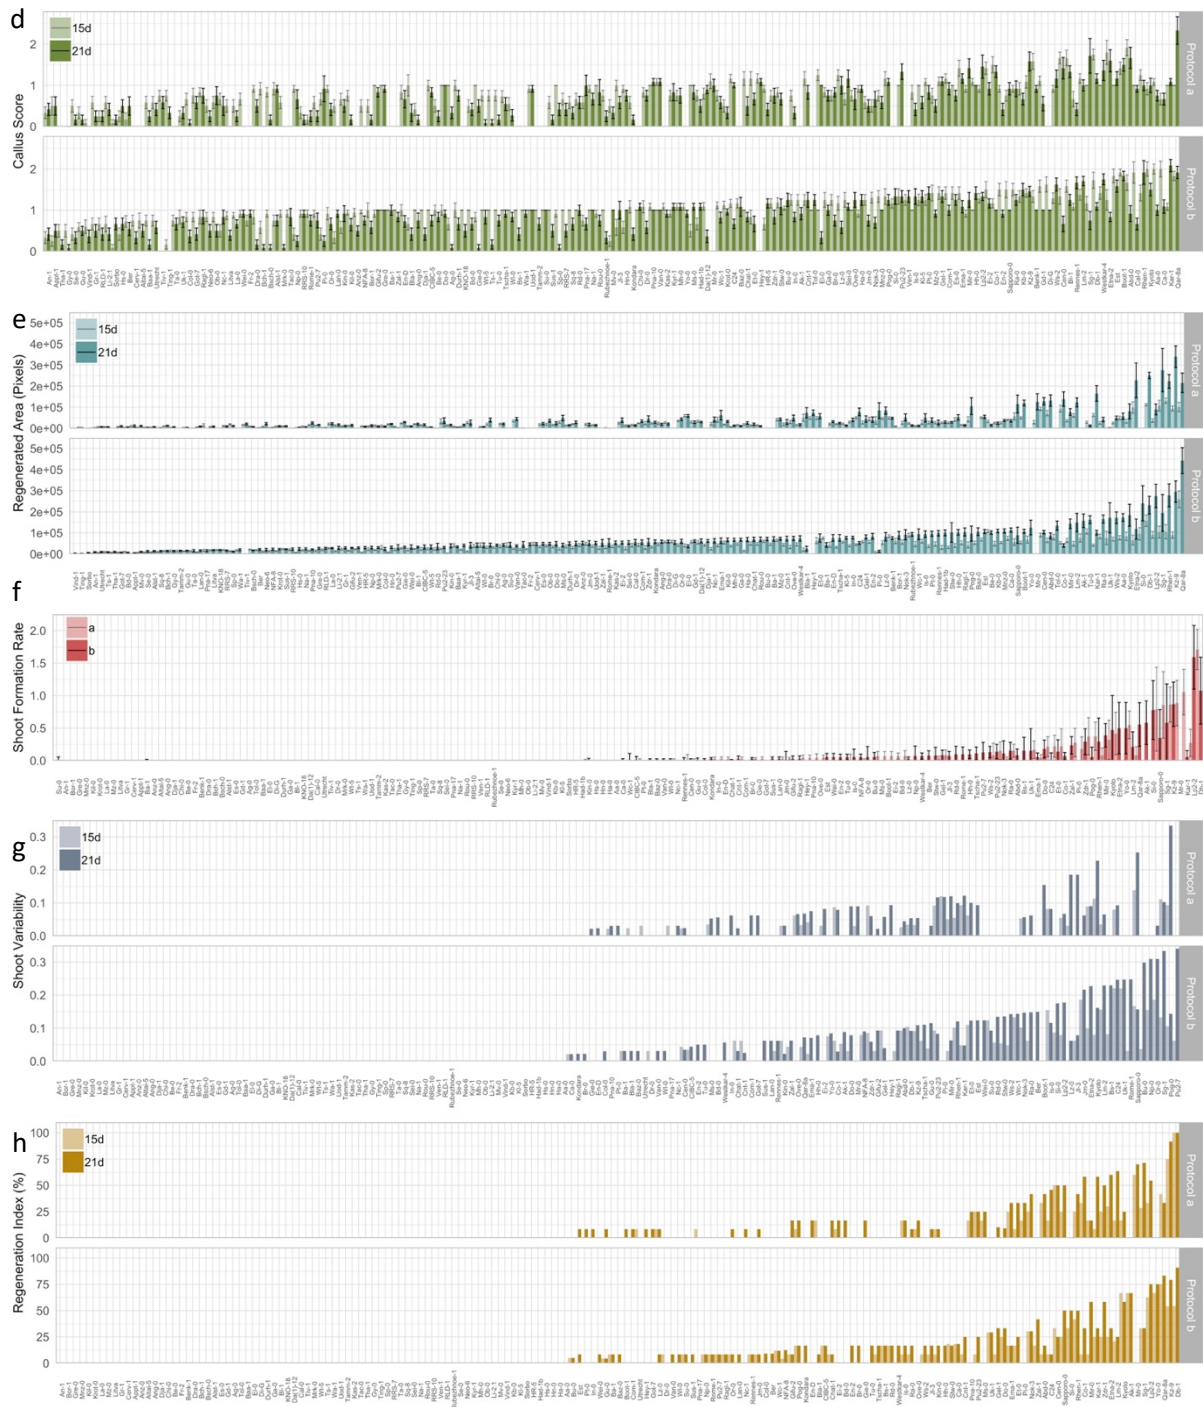

**Supplementary Figure 2.** Bar charts showing phenotypic variability in recorded traits other than shoot numbers, after 15 and 21 days on SIM using protocol a and b. For shoot primordia (a), undefined (b) and root-like structures (c), the y-axis reflects average counts, while for callus (d) it shows a score from 0 to 5 indicating the amount and greening of callus tissue. Regenerated area (e) is expressed in pixels, shoot formation rate (f) in shoots per day (between 15 and 21 days on SIM) and shoot variability (g) is calculated as the standard deviation of shoot numbers divided by the regeneration index (h), which is the percentage of explants forming at least one shoot. Where possible, standard errors are provided as error bars, based on n = 12 independent biological replicates.

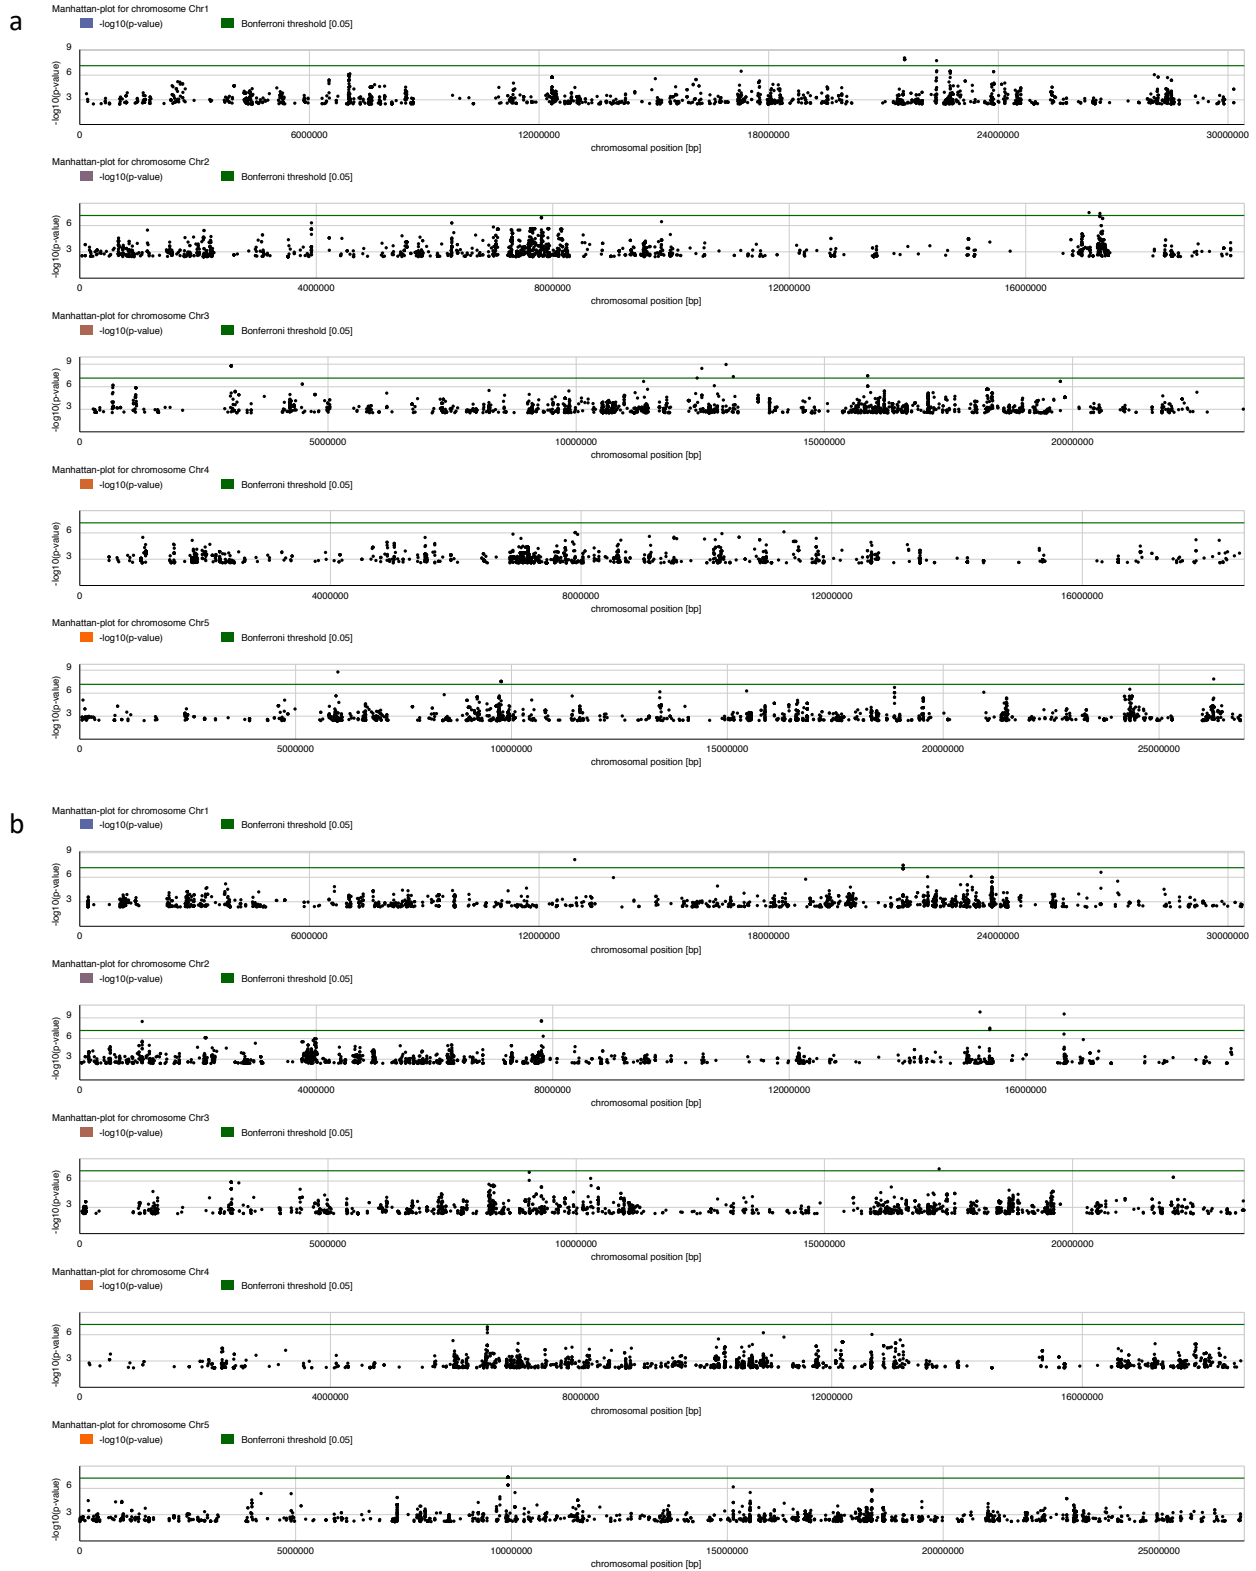

**Supplementary Figure 3.** Manhattan plots for all chromosomes showing SNP associations to regenerated shoot numbers after 21 days on SIM with protocol a (**a**) and b (**b**). Green lines mark a Bonferroni-corrected significance threshold of 5%, deduced from an efficient mixed-model association expedited (EMMAX) test with  $n = 129$  and  $n = 149$  independent samples for protocol a and b.

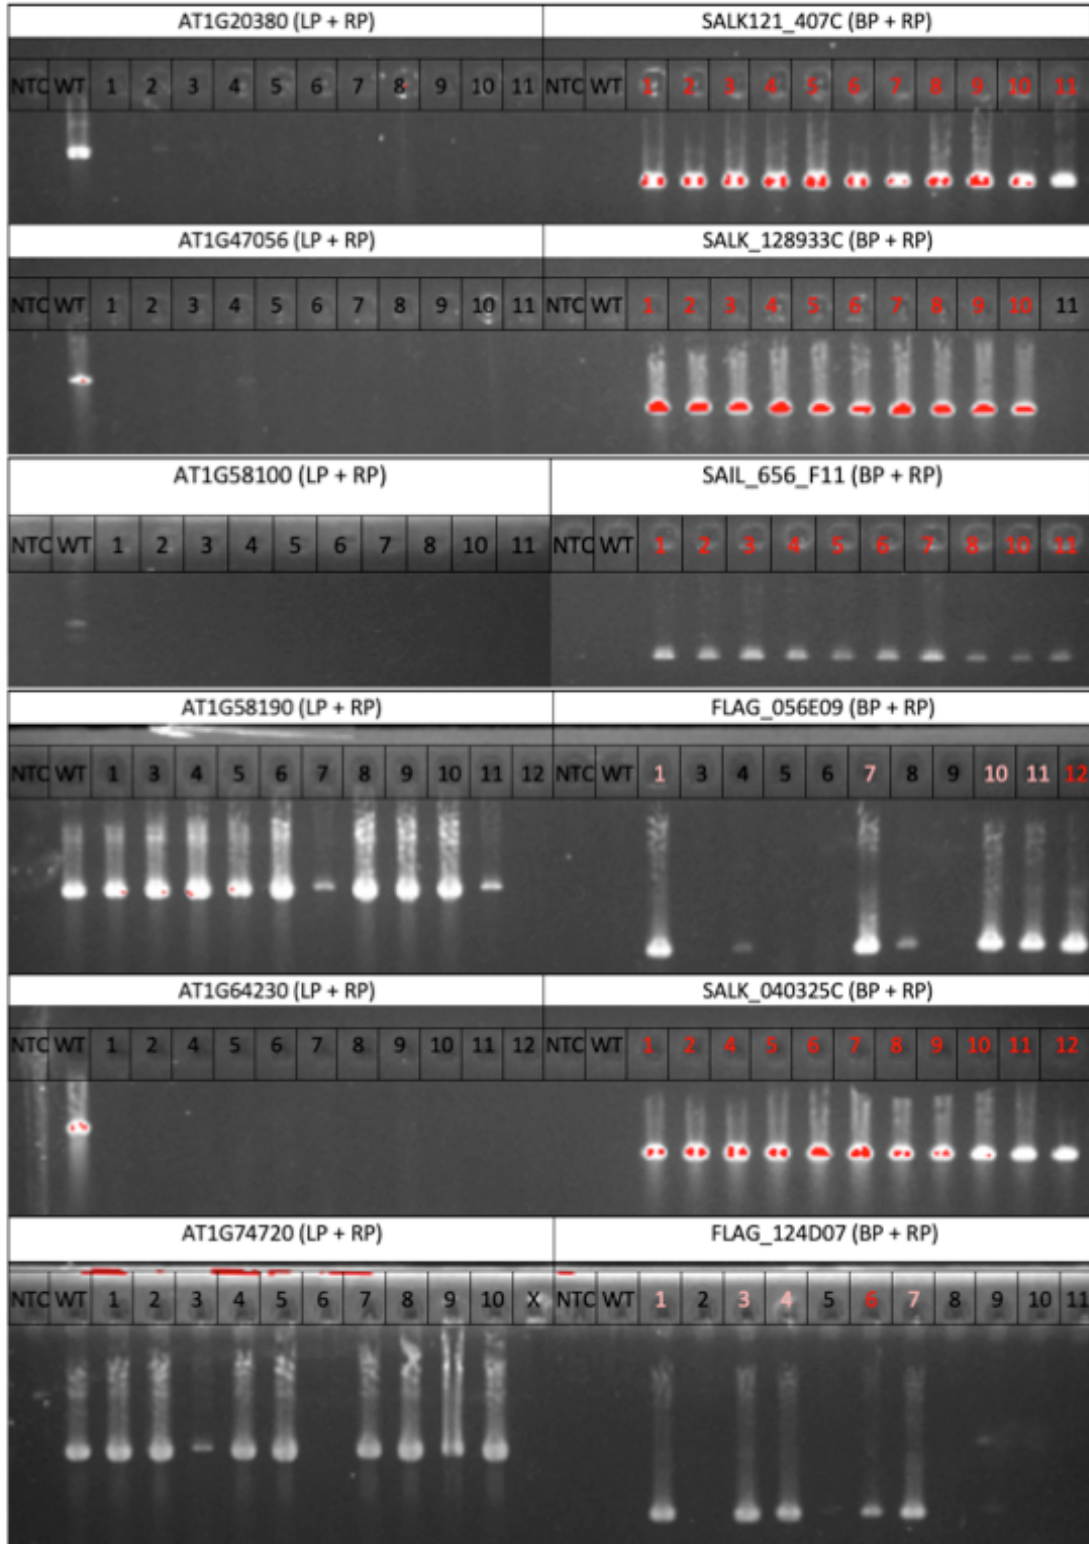

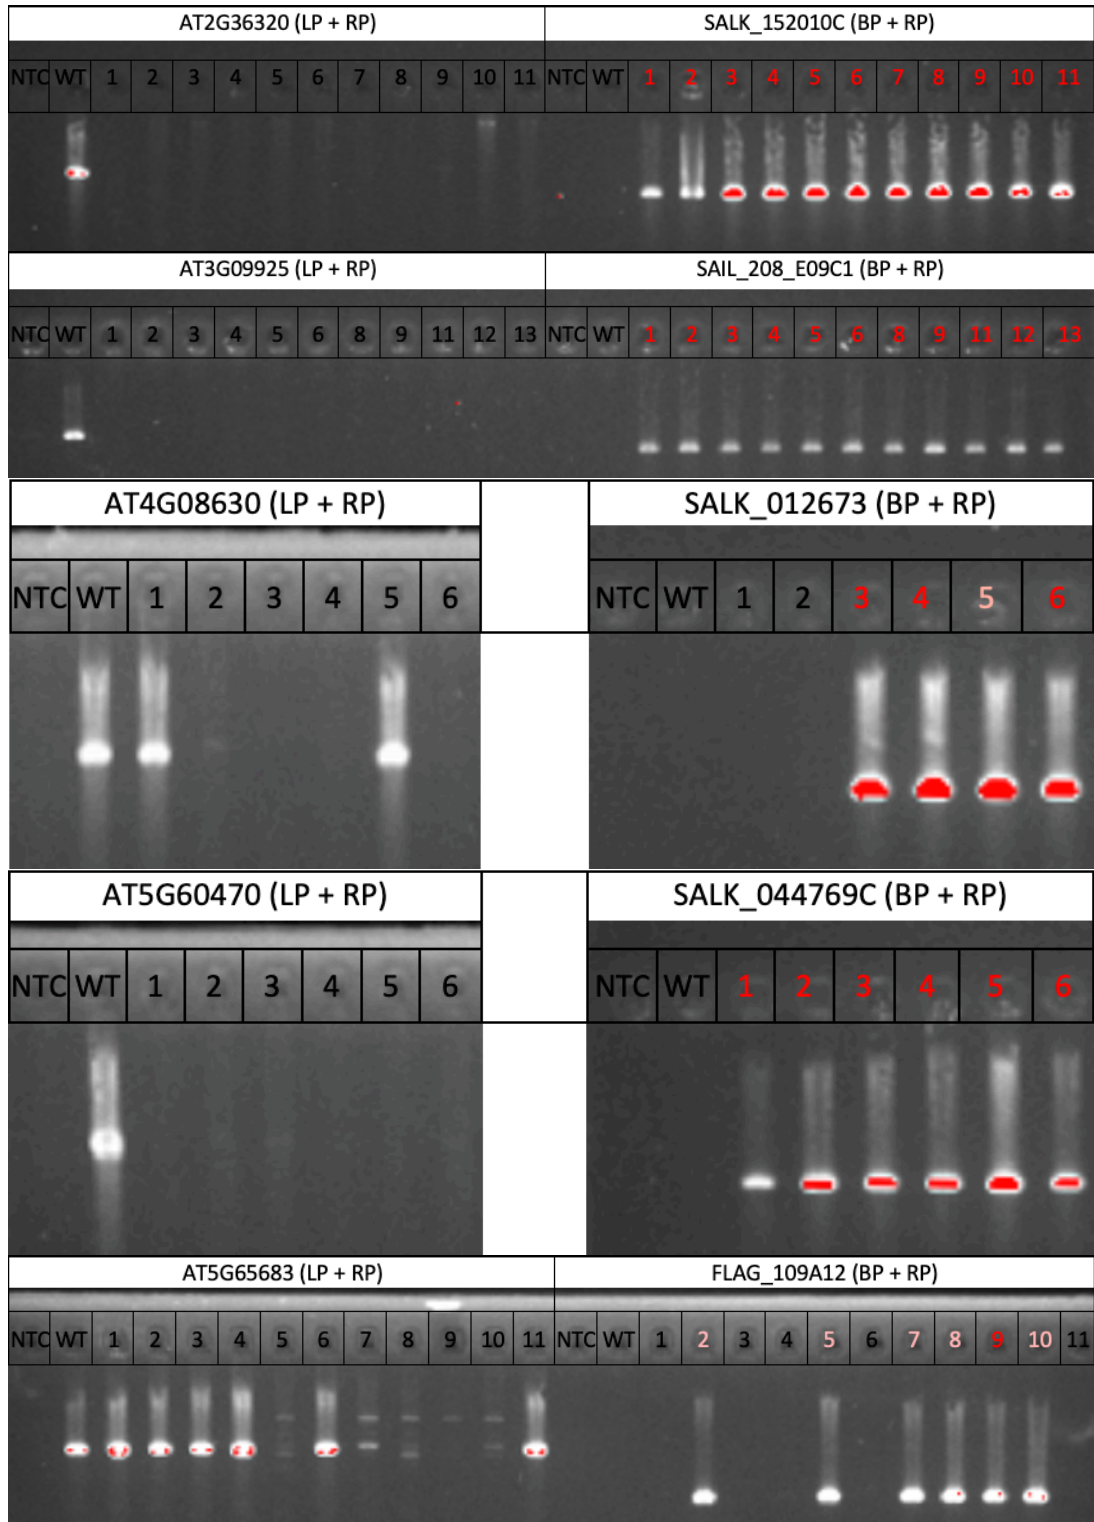

**Supplementary Figure 4.** PCR genotyping of T-DNA insertion lines. Gene reactions (left + right primer) are on the left and T-DNA reactions (border + right primer) are on the right. For an overview of the primers refer to Supplementary Table 1. Homozygous mutants are marked red and heterozygous inserts are pink. Numbers refer to individual plants, NTC is no-template control and WT is wild-type (either Col-0, Col-3 or WS).

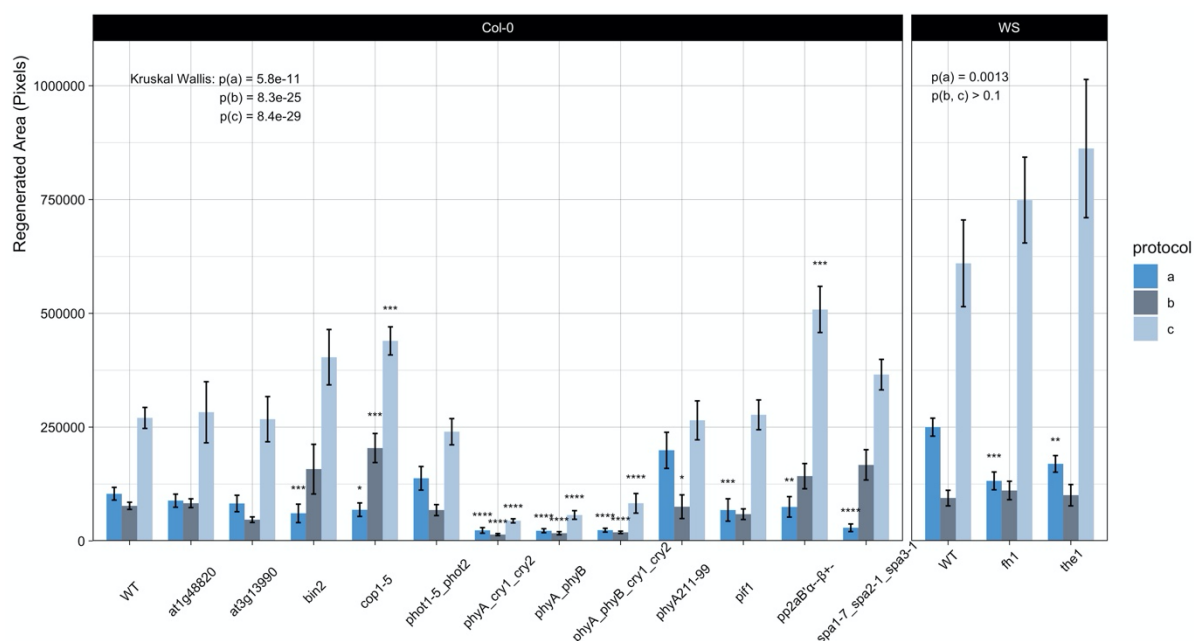

**Supplementary Figure 5.** Regeneration in random T-DNA insertion lines and mutants related to light signalling and phosphorylation as negative and positive controls for the data presented in Fig. 7. P-values are deduced from a global Kruskal-Wallis test and Dunn's many-to-one test for pairwise, two-sided comparisons to a single control (\* =  $p < 0.1$ , \*\* =  $p < 0.05$ , \*\*\* =  $p < 0.01$ ) and error bars reflect standard errors based on  $n = 24$  independent biological replicates.

**Supplementary Table 1.** Primers used for PCR and RT-qPCR.

| Gene               | Primer               | Sequence (5' → 3')                  | T (°C) |
|--------------------|----------------------|-------------------------------------|--------|
| AT1G20380 (POQR)   | SALK_121407C_LP      | TTGATCAGTCCCAAGGAAATG               | 49     |
|                    | SALK_121407C_RP      | ATGTTGGTTGAGTTGACGGAG               | 52     |
| AT1G47056 (VFB1)   | SALK_128933C_LP      | TGCGGTAACCTTAAATTTTG                | 45     |
|                    | SALK_128933C_RP      | CTCGAGATTCGAGCAATGATC               | 50     |
| AT1G58100 (TCP8)   | SAIL_656_F11_LP      | TGGATTGTAATGAGCTGTCCC               | 52     |
|                    | SAIL_656_F11_RP      | TTGAAGCTGATGATGAAACCC               | 50     |
| AT1G58190 (RLP9)   | FLAG_056E09_LP       | GTCGAGCACTCCAAGAGATTG               | 53     |
|                    | FLAG_056E09_RP       | GGACACTTGCCAAAATTCTCTC              | 51     |
| AT1G64230 (UBC28)  | SALK_040325C_LP      | GAGGTGGTAATTGCCGCTAAG               | 53     |
|                    | SALK_040325C_RP      | TTGGGTCCGTTAACAAATGAAC              | 50     |
| AT1G74720 (QKY)    | FLAG_124D07_LP       | CGCCATATCTTTTCATGTGTG               | 49     |
|                    | FLAG_124D07_RP       | AGACCTTCTTCACCTCTTCGC               | 54     |
| AT2G17950 (WUS)    | WUS_transcript_FW    | ATCCCAGCTCAATAACGGGAA               | 54     |
|                    | WUS_transcript_RV    | GTTTGCCCATCCTCCACCTA                | 55     |
| AT2G36320 (SAP4)   | SALK_152010C_LP      | ACAAGCAAAAAGCCACACAATC              | 51     |
|                    | SALK_152010C_RP      | TAGAATTTGGCACCACCAAAC               | 50     |
| AT3G09925          | SAIL_208_E09C1_LP    | GTGCATGTAATTTGCTTCCG                | 50     |
|                    | SAIL_208_E09C1_RP    | CAAACCTCAACGTGGTTGTGG               | 52     |
| AT3G54000 (TIP41L) | TIP41L_transcript_FW | GTGAAAACCTGTTGGAGAGAAGCAA           | 53     |
|                    | TIP41L_transcript_RV | TCAACTGGATACCCCTTTCGCA              | 54     |
| AT4G08630          | SALK_012673C_LP      | TATATGCCGTTGTGGTAGACG               | 51     |
|                    | SALK_012673C_RP      | GTCTCATTGCTTCCACCAG                 | 53     |
| AT4G27960 (UBC9)   | UBC9_transcript_FW   | TCACAATTTCCAAGGTGCTGC               | 54     |
|                    | UBC9_transcript_RV   | TCATCTGGGTTTGGATCCGT                | 54     |
| AT5G60470 (EGRET)  | SALK_044769C_LP      | ATATCCCACTTTTCAGCC                  | 52     |
|                    | SALK_044769C_RP      | TGATGTCATGCATCTGTTTCG               | 50     |
| AT5G65683 (WAVH2)  | FLAG_109A12_LP       | TTGTTTTATCGGACGGTCAAG               | 50     |
|                    | FLAG_109A12_RP       | CTCTGCAATACAAAAGGCCAC               | 51     |
| SALK T-DNA border  | SALK_LB1.3           | ATTTTGCCGATTTTCGGAAC                | 48     |
| SAIL T-DNA border  | SAIL_LB3             | TAGCATCTGAATTTTCATAACCAATCTCGATACAC | 54     |
| FLAG T-DNA border  | FLAG_LB4             | CGTGTGCCAGGTGCCACGGAATAGT           | 65     |
